# Supplementary material for: Comprehensive investigation into cuproptosis in the characterization of clinical features, molecular characteristics, and immune situations of clear cell renal cell carcinoma
Source: Frontiers journal article supplement (doi:10.3389/fimmu.2022.948042), 2022-10-06
Supplement: Table_2.XLS [file Table_2.XLS]

## Sheet: stromalGene-diff
ID	logFC	AveExpr	t	P.Value	adj.P.Val	B
KDR	-39.0398	42.9638	-16.2356	2.19e-48	2.27e-45	99.2115
LDB2	-10.1319	15.2982	-13.7471	5.55e-37	9.71e-35	73.1163
EMCN	-11.7074	14.596	-13.0994	3.76e-34	4.41e-32	66.6433
ERG	-4.13935	6.45324	-12.9425	1.78e-33	1.91e-31	65.0989
CD93	-31.4917	45.2353	-12.4855	1.57e-31	1.3e-29	60.6571
CDH5	-18.1369	29.6075	-11.5851	8.18e-28	4.2e-26	52.1654
RASGRP3	-2.01125	4.48555	-11.2697	1.51e-26	6.66e-25	49.2788
PDE2A	-4.00841	5.42233	-10.9149	3.76e-25	1.43e-23	46.091
PCDH12	-7.54366	11.8413	-10.6978	2.61e-24	9.08e-23	44.172
ENPEP	-34.5926	59.0689	-9.57809	3.81e-20	8.46e-19	34.6838
ARHGAP28	-0.67893	1.35383	-8.85317	1.29e-17	2.18e-16	28.9356
RARRES2	81.5427	128.743	8.83421	1.49e-17	2.51e-16	28.7897
COL15A1	-15.2784	22.699	-8.60319	8.87e-17	1.38e-15	27.0307
ADAMTS5	-2.18781	4.44998	-8.22126	1.57e-15	2.14e-14	24.2004
RAMP3	-24.9399	52.0134	-8.18247	2.09e-15	2.81e-14	23.9184
ZNF423	-0.43324	0.920663	-8.14424	2.77e-15	3.67e-14	23.6415
ZEB2	-1.46933	5.05487	-7.95054	1.13e-14	1.4e-13	22.2544
PRKG1	-1.29602	2.91472	-7.6037	1.32e-13	1.46e-12	19.8365
HEPH	-1.51793	3.51755	-7.27538	1.26e-12	1.25e-11	17.6277
ECM2	-2.24924	5.16157	-7.14201	3.06e-12	2.93e-11	16.7532
LRRC32	-12.5037	35.3411	-7.03445	6.22e-12	5.76e-11	16.0576
ENPP2	-49.751	70.6761	-6.99791	7.91e-12	7.25e-11	15.8233
TFEC	-2.84713	5.91762	-6.99622	7.99e-12	7.33e-11	15.8125
SP140	0.559343	0.858069	6.66005	6.88e-11	5.7e-10	13.7053
SPON2	11.45	14.9582	6.33743	5.01e-10	3.76e-09	11.7656
ITM2A	-7.27361	17.5809	-6.2557	8.18e-10	5.99e-09	11.2873
RUNX1T1	-0.23459	0.504414	-6.21831	1.02e-09	7.4e-09	11.0703
EDNRA	-3.40843	8.93468	-6.16006	1.44e-09	1.03e-08	10.7345
MAF	-7.49214	28.3394	-5.88466	7.09e-09	4.65e-08	9.18384
CD200	-3.94555	14.583	-5.55581	4.39e-08	2.59e-07	7.41404
PDGFRB	-12.8511	39.1151	-5.3669	1.2e-07	6.71e-07	6.43827
VCAM1	-34.862	101.991	-5.18301	3.11e-07	1.65e-06	5.51757
GIMAP5	-0.37041	1.11788	-5.16559	3.4e-07	1.79e-06	5.43186
FBLN2	-4.34489	9.94151	-5.1373	3.93e-07	2.04e-06	5.29318
ADAM12	1.34404	1.70516	5.04909	6.12e-07	3.1e-06	4.86531
DDR2	-1.51256	3.63944	-4.85835	1.56e-06	7.45e-06	3.96311
SERPING1	53.3112	179.055	4.85253	1.61e-06	7.65e-06	3.93606
SPON1	-11.7817	17.9261	-4.84801	1.64e-06	7.81e-06	3.91512
FASLG	0.847152	1.62807	4.68093	3.63e-06	1.64e-05	3.15245
WNT2	0.409161	0.214151	4.21637	2.92e-05	0.000113	1.16217
C1QA	58.429	188.847	3.98139	7.81e-05	0.000279	0.229461
FMO1	-8.02642	18.075	-3.74135	0.000203	0.000667	-0.6713
SH2D1A	0.753572	2.14681	3.67427	0.000263	0.000842	-0.91352
CXCL12	-5.38052	16.1359	-3.66879	0.000268	0.000858	-0.93313
AOC3	-3.17419	11.1334	-3.50721	0.000491	0.001473	-1.49863
KCNJ8	-2.39922	11.0228	-3.48961	0.000524	0.00156	-1.55879
MMP3	0.254632	0.146063	3.48534	0.000532	0.001582	-1.57332
CD14	14.6115	63.4566	3.3641	0.000824	0.002328	-1.9792
FCGR2B	0.449662	1.58341	3.30982	0.000997	0.002763	-2.15648
EDIL3	-6.98754	23.7271	-3.26651	0.001159	0.003156	-2.2959
COL6A3	6.98872	12.1416	3.20276	0.001443	0.003827	-2.49798
PTGIS	2.58538	3.88593	3.19787	0.001467	0.003881	-2.51332
COX7A1	18.5074	22.0262	3.1844	0.001536	0.004041	-2.55545
TNFSF4	0.239831	1.23391	3.17492	0.001586	0.004156	-2.58502
C1QB	46.3111	179.802	3.15792	0.00168	0.004369	-2.63781
HGF	2.99517	3.15577	3.13047	0.001842	0.004744	-2.72246
AIF1	5.56034	30.8564	3.11818	0.001919	0.004917	-2.76011
COL10A1	0.676962	0.658959	2.7596	0.005988	0.01321	-3.79617
CXCL9	13.5682	32.9013	2.73871	0.006376	0.013944	-3.85275
TLR2	1.22886	7.2252	2.69113	0.007347	0.015736	-3.98006
COL8A2	2.11884	2.21647	2.63321	0.008706	0.018159	-4.13211
EGFL6	1.79415	0.886019	2.62854	0.008825	0.018371	-4.14421
SAMSN1	0.733347	3.74065	2.58133	0.01011	0.020623	-4.26555
SULF1	-2.63405	13.3766	-2.44158	0.01495	0.028625	-4.61213
MXRA5	4.18765	6.64928	2.42251	0.015749	0.029894	-4.65797
COMP	1.33112	2.0059	2.32756	0.020312	0.036889	-4.88092
ISLR	8.68156	10.3508	2.30104	0.021778	0.039047	-4.94164
THBS2	6.7712	22.8861	2.25127	0.024779	0.043482	-5.05376
LUM	13.244	29.1407	2.20597	0.027816	0.047799	-5.15369
ITIH3	3.32392	1.59545	2.18563	0.02928	0.049856	-5.19791
C3AR1	-1.76003	12.6245	-2.14709	0.032241	0.053912	-5.28062
SIGLEC1	0.576134	3.30001	2.06965	0.03897	0.062824	-5.4424
PLXDC1	0.765436	5.89977	1.77269	0.076856	0.10916	-6.00854
VSIG4	3.19642	18.2912	1.60261	0.109618	0.147073	-6.29382
MS4A4A	-1.11877	10.0359	-1.54746	0.12235	0.161747	-6.38021
CD248	4.34221	30.3446	1.53724	0.124833	0.164592	-6.3959
SFRP4	1.78022	4.20581	1.53293	0.125891	0.165838	-6.40248
CXCL14	48.2696	262.356	1.53184	0.126161	0.166128	-6.40415
COL1A2	17.7983	84.2162	1.50778	0.132209	0.172976	-6.44053
ACTG2	1.90877	8.31022	1.49407	0.135754	0.177068	-6.461
FRZB	-11.995	46.3682	-1.47338	0.141245	0.183452	-6.49156
F13A1	-2.38297	16.0835	-1.2055	0.228548	0.280859	-6.84888
ITGAM	0.870032	4.85597	1.20532	0.228619	0.28094	-6.8491
CD163	-2.42405	17.6626	-1.16571	0.244257	0.29798	-6.8959
ASPN	0.898297	6.21661	1.10897	0.267948	0.323186	-6.96023
DCN	1.28308	6.52822	1.09914	0.272208	0.327715	-6.97105
IGSF6	0.421004	6.17737	1.0536	0.292548	0.349398	-7.01992
ITIH5	0.927577	9.54262	0.979752	0.327657	0.385988	-7.0948
MS4A6A	-0.85107	14.8081	-0.91756	0.359269	0.418831	-7.15366
BGN	-29.5048	434.904	-0.90494	0.365912	0.425764	-7.16514
CD86	0.310135	5.42102	0.886507	0.375748	0.435646	-7.18161
LY86	0.517133	10.6776	0.816234	0.414734	0.47509	-7.24131
APBB1IP	0.617882	15.3112	0.753588	0.451432	0.511622	-7.29039
OLFML2B	0.934406	20.7842	0.589402	0.555843	0.611851	-7.40047
FCGR2A	-0.16238	10.9048	-0.24757	0.804566	0.835003	-7.54337
COL5A3	0.106801	6.36193	0.213451	0.831058	0.857849	-7.55123
COL3A1	-1.53284	114.033	-0.12494	0.900619	0.917224	-7.56619
CSF1R	-0.16501	23.3437	-0.10363	0.917502	0.931371	-7.56862
CCR1	0.033295	6.55161	0.062989	0.949799	0.958143	-7.57201

## Sheet: immunGene-diff
ID	logFC	AveExpr	t	P.Value	adj.P.Val
HLA-DRA	-160.832	1147.55	-2.33886	0.019714	0.03602
HLA-E	-104.444	494.688	-6.28547	6.85e-10	5.06e-09
MSN	-45.9922	138.713	-12.8616	3.96e-33	4.02e-31
LYZ	-40.725	114.556	-3.54009	0.000435	0.001322
HLA-DPA1	-23.666	120.86	-2.96343	0.003179	0.007656
TPP1	-17.7269	83.3867	-5.90322	6.38e-09	4.21e-08
NFKBIA	-13.1828	75.8634	-3.75552	0.000192	0.000634
GIMAP4	-12.7244	40.6282	-7.851	2.31e-14	2.77e-13
GIMAP6	-12.0033	19.2953	-14.3755	8.67e-40	2.38e-37
FGL2	-10.1899	23.7613	-6.39356	3.57e-10	2.72e-09
SH2B3	-7.3512	17.7843	-10.2267	1.61e-22	4.63e-21
CYBB	-4.36419	20.8604	-2.3882	0.017281	0.032273
RASSF2	-3.58128	10.1024	-5.85145	8.55e-09	5.56e-08
MFSD1	-3.25439	14.9699	-5.81414	1.06e-08	6.77e-08
FLI1	-2.69092	6.02336	-11.6506	4.44e-28	2.36e-26
TNFAIP3	-2.16592	15.3311	-2.73251	0.006496	0.014166
ITGA4	-1.88813	4.30452	-7.70854	6.35e-14	7.25e-13
CD302	-1.39304	2.56541	-9.82754	4.79e-21	1.17e-19
IRF8	-1.36509	5.65566	-3.81334	0.000153	0.000517
MNDA	-1.22496	8.50826	-2.25748	0.024386	0.042898
ARHGEF6	-1.20262	7.88604	-3.66541	0.000272	0.000868
PTPRE	-0.98018	3.77493	-7.38208	6.1e-13	6.28e-12
P2RY14	-0.93357	2.06761	-6.03563	2.98e-09	2.04e-08
KLRK1	0.299915	0.320764	7.19062	2.22e-12	2.15e-11
RHOH	0.320451	1.09873	3.82024	0.000149	0.000505
IL18RAP	0.352303	0.687408	4.79058	2.16e-06	1.01e-05
TRAF3IP3	0.525972	1.34124	4.90073	1.27e-06	6.14e-06
LILRB2	0.713605	3.55286	3.40098	0.000722	0.002075
VAV1	0.729249	3.56623	3.20901	0.001413	0.003757
LILRB1	0.736232	2.99434	4.17479	3.49e-05	0.000133
PTGER2	0.75944	2.37443	2.38043	0.017646	0.032847
CD247	0.81947	3.07249	3.8285	0.000144	0.00049
KLRB1	0.893498	4.31789	2.8931	0.003972	0.009276
FGR	0.92242	5.7706	2.76344	0.005919	0.013085
IFI30	1.02588	0.978941	11.0227	1.42e-25	5.68e-24
BIN2	1.14118	4.50707	4.49836	8.43e-06	3.57e-05
ZAP70	1.29464	1.85886	8.25936	1.18e-15	1.64e-14
IL10RA	1.31995	8.50998	2.28806	0.022528	0.040157
PSTPIP1	1.42163	1.868	8.76765	2.5e-17	4.12e-16
LAIR1	1.43635	5.65613	3.85085	0.000132	0.000452
CSTA	1.45491	2.82421	7.1701	2.54e-12	2.45e-11
IL2RB	1.48369	6.31299	3.18544	0.001531	0.004028
LCK	1.52962	4.93625	3.88435	0.000116	0.0004
MYO1F	1.56248	4.69969	5.84475	8.88e-09	5.75e-08
SELPLG	1.62957	13.2254	2.35541	0.018867	0.034707
GMIP	1.67437	5.71986	6.2274	9.68e-10	7.03e-09
GNLY	1.78854	4.37242	4.55006	6.66e-06	2.88e-05
ITGAL	1.90685	7.21659	3.38478	0.000765	0.002184
LPXN	1.95013	9.93953	4.14657	3.93e-05	0.000149
CD37	2.04768	7.34023	4.78418	2.23e-06	1.04e-05
GLRX	2.06408	17.0845	2.32831	0.020272	0.036834
TPST2	2.39519	5.10541	6.64821	7.41e-11	6.11e-10
GZMB	2.63889	4.56585	5.89371	6.73e-09	4.43e-08
ADAM8	2.64849	2.59042	7.02413	6.66e-12	6.14e-11
LGALS9	2.90927	9.65653	5.9844	4.01e-09	2.71e-08
BCL2A1	2.94882	4.24667	5.94785	4.95e-09	3.3e-08
GMFG	2.95079	24.5596	2.51745	0.012115	0.024014
NCF4	2.97503	7.10797	6.70895	5.06e-11	4.25e-10
LST1	3.33235	8.60913	6.4496	2.53e-10	1.97e-09
MICAL1	3.47059	6.52339	10.3083	7.93e-23	2.37e-21
CLEC2B	3.82388	7.50082	5.42992	8.61e-08	4.9e-07
GZMH	3.89209	7.95899	5.77413	1.32e-08	8.35e-08
LSP1	3.98552	10.2509	5.93487	5.33e-09	3.54e-08
S100A8	4.20024	10.6131	3.02284	0.002626	0.006477
CD27	4.56169	7.44118	5.09312	4.91e-07	2.52e-06
LTB	4.87766	6.35205	7.46233	3.52e-13	3.72e-12
GZMK	5.03357	11.7394	3.38458	0.000766	0.002185
GBP2	5.18901	24.6524	3.53652	0.000441	0.001337
CORO1A	5.50061	14.8945	5.61426	3.19e-08	1.93e-07
LY96	6.25211	13.2907	5.81641	1.04e-08	6.69e-08
CD2	6.37796	15.0497	4.64699	4.26e-06	1.9e-05
CD3D	6.60623	12.1579	5.67997	2.23e-08	1.37e-07
RHOG	7.26331	31.2217	7.66952	8.36e-14	9.42e-13
IL2RG	7.78291	14.0775	6.57027	1.2e-10	9.67e-10
CST7	8.02368	18.9359	3.99787	7.3e-05	0.000262
RAC2	8.58376	17.4486	7.00098	7.75e-12	7.11e-11
HLA-F	8.81918	37.5966	3.99028	7.53e-05	0.000269
CD52	8.94221	26.4959	4.77413	2.34e-06	1.08e-05
TCIRG1	9.48597	13.3675	14.3207	1.53e-39	3.98e-37
RGS1	10.7372	31.9124	4.1876	3.3e-05	0.000127
LAPTM5	16.6374	102.311	2.73662	0.006416	0.014016
EMP3	19.5749	39.5562	10.4919	1.6e-23	5.13e-22
FCER1G	19.6607	53.6138	5.74451	1.56e-08	9.78e-08
NKG7	19.7984	34.1337	5.45972	7.35e-08	4.23e-07
IL32	25.641	84.972	5.17093	3.31e-07	1.74e-06
TYROBP	33.6752	97.5398	5.67037	2.35e-08	1.44e-07
CCL5	39.5114	52.3369	7.30071	1.06e-12	1.06e-11
CD74	285.279	1425.47	3.21186	0.001399	0.003724
